# Supplementary material for: Enhancing the bifunctional oxygen reduction and evolution activity of CoNC by introducing a trace amount of Fe
Source: Royal Society of Chemistry journal article supplement (doi:10.1039/d3cp04012g), 2023-01-01
Supplement: d3cp04012g1.pdf [file d3cp04012g1.pdf]

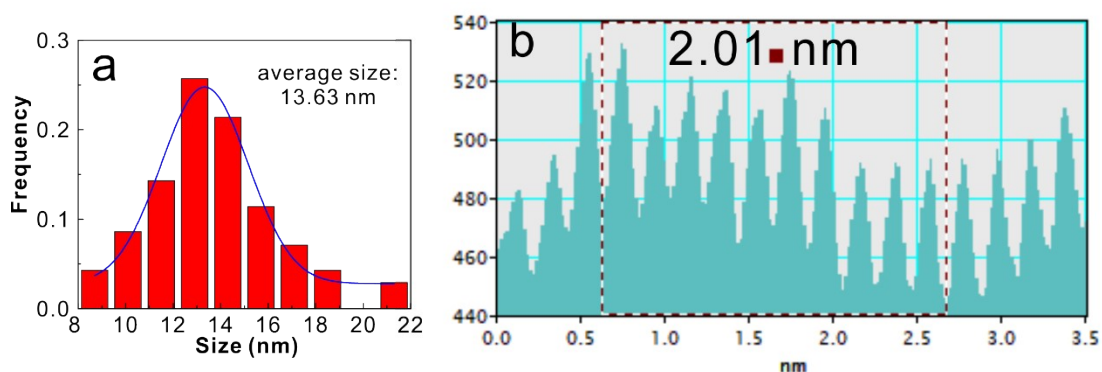

**Fig. S1** (a) particle size distribution of the metal nanoparticles in Fe-CoNC, (b) measurement of lattice fringe in Fig. 1d

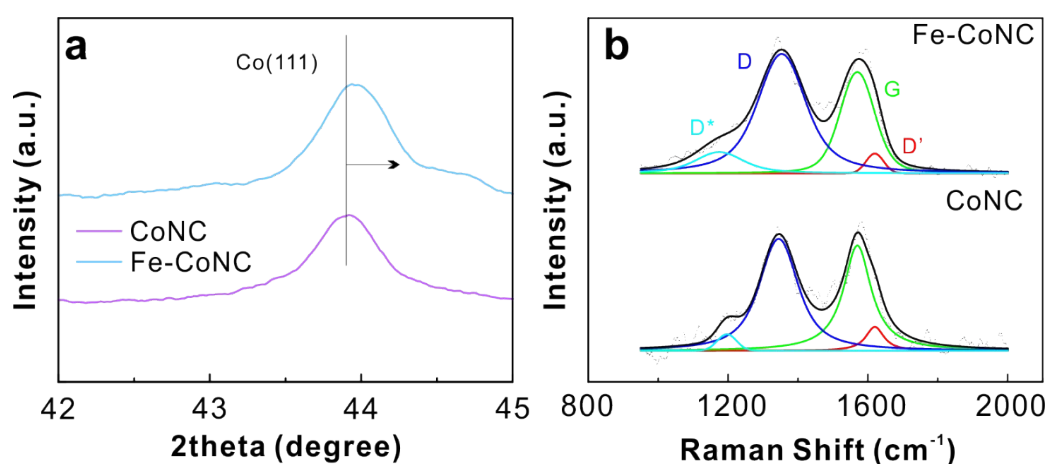

**Fig. S2** (a) Magnified XRD patterns for CoNC and Fe-CoNC, (b) titting of the Raman spectra for CoNC and Fe-CoNC

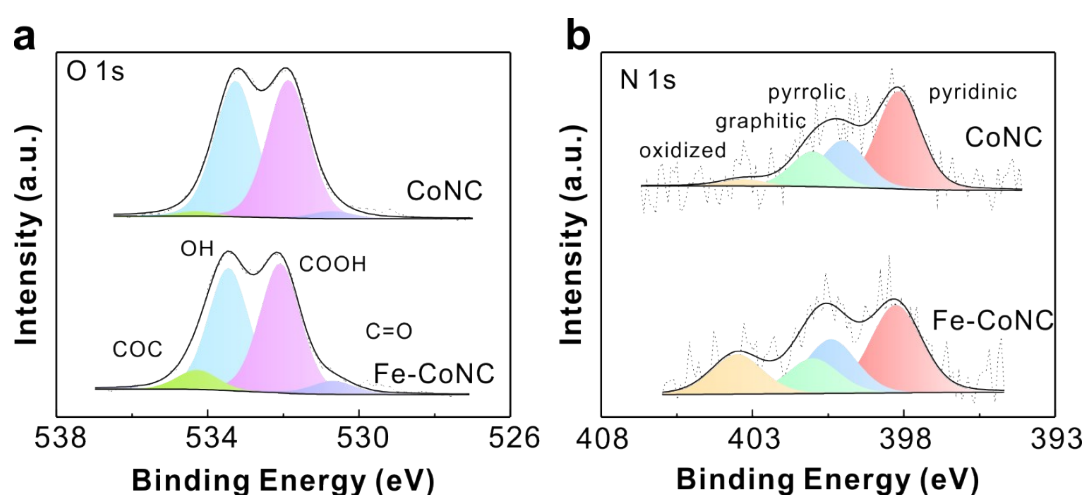

**Fig. S3** O1s and N1s XPS spectra for CoNC and Fe-CoNC

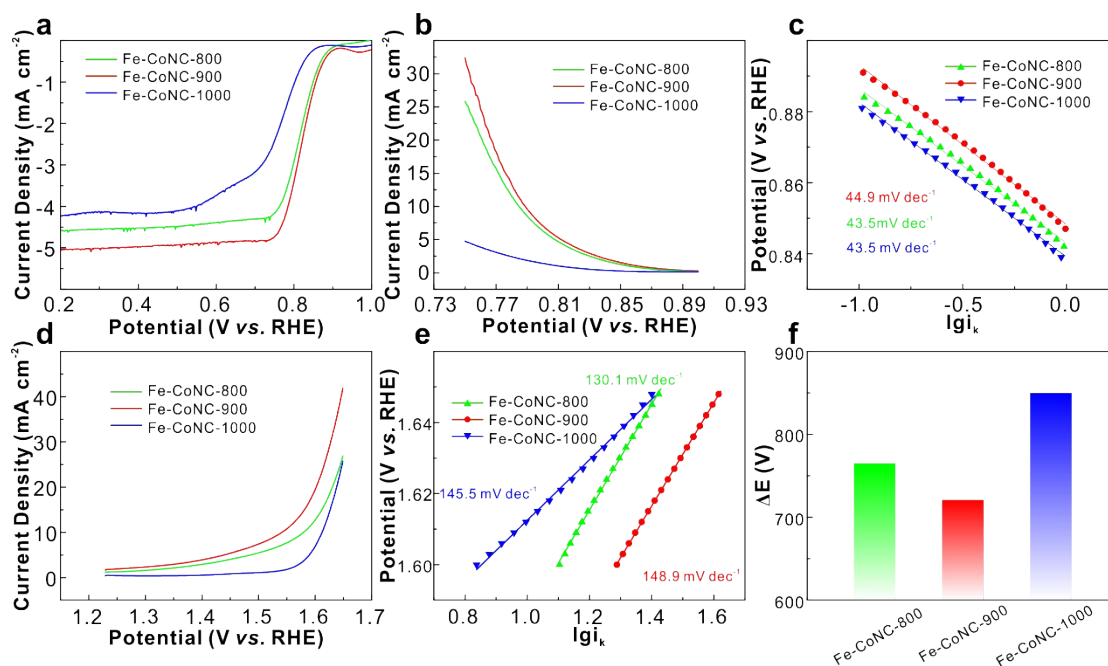

**Fig. S4** (a) ORR polarization curves obtained in 0.1 mol L<sup>-1</sup> KOH, (b) corresponding kinetic current density curves and (c) Tafel plots of Fe-CoNC pyrolyzed at different temperature. (d) OER polarization curves obtained in 1 mol L<sup>-1</sup> KOH and (e) corresponding Tafel plots of Fe-CoNC pyrolyzed at different temperature. (f) comparison of potential difference of the ORR half-wave potential and the potential where OER current density reaches 10 mA cm<sup>-2</sup>.

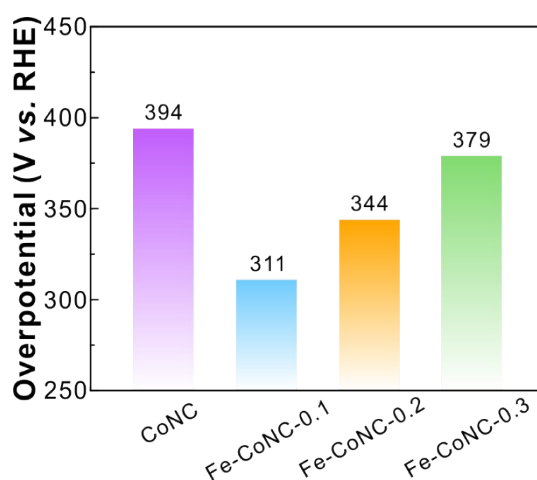

**Fig. S5** Comparison of the  $\eta_{i=10}$  for CoNC and Fe-CoNC with different doping level

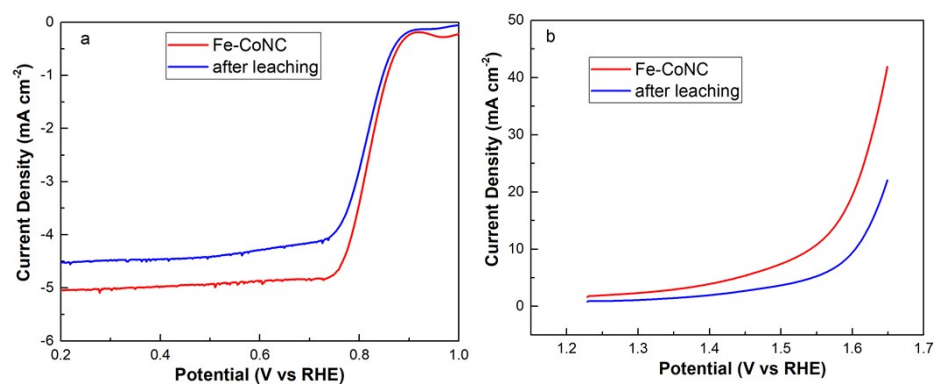

**Fig. S6 (a) ORR and (b) OER polarization curves of Fe-CoNC before and after acid leaching**
